# Supplementary material
Source: PubMed Central journal article supplement (PMC5319901)
Supplement: NIHMS827289-supplement-2.pdf [file NIHMS827289-supplement-2.pdf]

**Supplementary Table 1: Molecular information.**

| <b>ID</b> | <b>Patient #</b> | <b>CHM Mutation</b>  | <b>Type of Mutation</b> | <b>Exon/Intron Location</b> | <b>Predicted Change</b> |
|-----------|------------------|----------------------|-------------------------|-----------------------------|-------------------------|
| 12001     |                  | c.519delAG**         | frameshift              | Exon 5                      | p.?                     |
| 13004     | P6               | deletion of exon 1   | deletion                | Exon 1                      | REP1 absent             |
| 13005     |                  | c.1663A>T            | nonsense                | Exon 14                     | p.Arg555*               |
| 13012     |                  | c.189+1 G>T          | splice site             | Intron 3                    | p.?                     |
| 13013     |                  | NA                   | NA                      | NA                          | NA                      |
| 13015     | P5               | del. entire gene     | deletion                | del. entire gene            | REP1 absent             |
| 13017     |                  | C                    | C                       | C                           | C                       |
| 13019     |                  | NA                   | NA                      | NA                          | NA                      |
| 13020     |                  | NA                   | NA                      | NA                          | NA                      |
| 13027     |                  | c.1185C>G            | nonsense                | Exon 9                      | p.Ser395*               |
| 13031     | P2               | deletion exons 3-8** | deletion                | Exons 3-8                   | p.?                     |
| 13032     |                  | c.757C>T             | nonsense                | Exon 6                      | p.Arg253*               |
| 13034     |                  | c.838C>T             | nonsense                | Exon 6                      | p.Arg270*               |
| 13035     |                  | NA                   | NA                      | NA                          | NA                      |
| 13039     | P4               | c.1327_1328delAT     | frameshift              | Exon 10                     | p.?                     |
| 13040     |                  | deletion exons 2-4   | deletion                | Exons 2-4                   | p.?                     |
| 13044     | P19              | c.315_318delTCAG     | frameshift              | Exon 5                      | p.?                     |
| 13045     |                  | NA                   | NA                      | NA                          | NA                      |
| 13048     |                  | c.700A>T             | nonsense                | Exon 5                      | p.Lys234*               |
| 13050     |                  | c.700A>T             | nonsense                | Exon 5                      | p.Lys234*               |
| 13051     |                  | c.799C>T             | nonsense                | Exon 6                      | p.Arg267*               |
| 13053     |                  | c.281delA**          | frameshift              | Exon 3                      | p.?                     |
| 13055     |                  | c.838C>T             | nonsense                | Exon 6                      | p.Arg270*               |
| 13056     |                  | c.445delT            | frameshift              | Exon 5                      | p.?                     |
| 13057     | P13              | c.745delT            | nonsense                | Exon 6                      | p.Arg239*               |
| 13061     |                  | del exon 9,10        | deletion                | exons 9, 10                 | p.?                     |
| 13062     |                  | c.1649 T>C           | missense                | Exon 14                     | p.Leu550Pro             |
| 13063     |                  | c. 1649 T>C          | missense                | Exon 14                     | p.Leu550Pro             |
| 13064     |                  | del exons 1-2        | deletion                | Exons 1, 2                  | REP1 absent             |
| 13066     |                  | del exons 1-2        | deletion                | Exons 1, 2                  | REP1 absent             |
| 13067     |                  | c.838C>T             | nonsense                | Exon 6                      | p.Arg270*               |
| 13068     |                  | C                    | C                       | C                           | C                       |
| 13070     |                  | NA                   | NA                      | NA                          | NA                      |
| 13071     |                  | c.1663A>T            | nonsense                | Exon 14                     | p.Arg555*               |
| 13072     |                  | c.1771-1g>a          | splice site             | Intron 14                   | p.?                     |
| 13073     |                  | c.1218C>A            | nonsense                | Exon 9                      | p.Cys406*               |
| 13074     |                  | c.1218C>A            | nonsense                | Exon 9                      | p.Cys406*               |
| 13075     |                  | c.1218C>A            | nonsense                | Exon 9                      | p.Cys406*               |
| 13076     |                  | c.1218C>A            | nonsense                | Exon 9                      | p.Cys406*               |
| 13078     |                  | del exons 1-15       | deletion                | Exons 1-15                  | REP1 absent             |
| 13080     |                  | c.817_818insC**      | frameshift              | Exon 6                      | p.?                     |
| 13085     |                  | del exons 2-4        | deletion                | Exons 2-4                   | REP1 absent             |
| 13086     |                  | c.1663A>T            | nonsense                | Exon 14                     | p.Arg555*               |
| 13087     |                  | c.1663A>T            | nonsense                | Exon 14                     | Arg555ter               |
| 13092     |                  | c.889A>T             | nonsense                | Exon 7                      | p.Lys297*               |
| 13099     | P3               | p.757C>T             | nonsense                | Exon 6                      | p.Arg253*               |
| 13100     |                  | p.757C>T             | nonsense                | Exon 6                      | p.Arg253*               |
| 13101     |                  | c.838C>T             | nonsense                | Exon 6                      | p.Arg270*               |
| 13102     |                  | c.838C>T             | nonsense                | Exon 6                      | p.Arg270*               |

|       |     |                                |             |                  |             |
|-------|-----|--------------------------------|-------------|------------------|-------------|
| 13106 |     | c.940-1g>t                     | splice site | Intron 7         | p.?         |
| 13117 |     | c.820-2a>g                     | splice site | intron 6         | p.?         |
| 13118 |     | c.49+5g>t                      | splice site | intron 1         | p.?         |
| 13122 |     | c.808C>T                       | nonsense    | Exon 6           | p.Arg270*   |
| 13125 |     | c.1437dupA                     | frameshift  | Exon 12          | p.?         |
| 13126 |     | c.580_581delGA**               | frameshift  | Exon 5           | p.?         |
| 13130 |     | c.1327_1328delAT               | frameshift  | exon 10          | p.?         |
| 13131 | P9  | .1327_1328delAT                | frameshift  | exon 10          | p.?         |
| 13132 |     | .1327_1328delAT                | frameshift  | exon 10          | p.?         |
| 13136 |     | c.1520A>G                      | missense    | Exon 13          | p.His507Arg |
| 13144 |     | c.715C>T                       | nonsense    | Exon 6           | p.Arg239*   |
| 13146 |     | NA                             | NA          | NA               | NA          |
| 13151 |     | c.1161C>T                      | nonsense    | exon 9           | p.Gln385*   |
| 13159 |     | c.1144G>T                      | nonsense    | exon 9           | p.Glu382*   |
| 13167 |     | del. entire gene               | deletion    | del. entire gene | REP1 absent |
| 13170 | P17 | c.757C>T                       | nonsense    | Exon 6           | p.Arg253*   |
| 13172 |     | c.1166+2T>G                    | splice site | Intron 8         | p.?         |
| 13173 |     | NA                             | NA          | NA               | NA          |
| 13177 |     | c.519delAG                     | frameshift  | Exon 5           | p.?         |
| 13181 |     | c.116+1 G>A                    | splice site | Intron 2         | p.?         |
| 13183 |     | c.745delT**                    | frameshift  |                  | p.?         |
| 13185 |     | c.1631delA                     | frameshift  | Exon 14          | p.?         |
| 13186 | P14 | c.1631delA                     | frameshift  | Exon 14          | p.?         |
| 13188 | P16 | c.757C>T                       | nonsense    | Exon 6           | p.Arg253*   |
| 13190 | P8  | del. entire gene               | deletion    | del. entire gene | REP1 absent |
| 13193 |     | C                              | C           | C                | C           |
| 13195 |     | c.820-2a>g                     | splice site | intron 6         | p.?         |
| 13197 | P7  | deletion exons 3-8             | deletion    | Exons 3-8        | p.?         |
| 13200 |     | c.910G>T                       | nonsense    | exon 7           | p.Glu304*   |
| 13203 | P15 | NA                             | NA          | NA               | NA          |
| 13204 |     | NA                             | NA          | NA               | NA          |
| 13205 |     | NA                             | NA          | NA               | NA          |
| 13208 |     | c.519delAG                     | frameshift  | Exon 5           | p.?         |
| 13209 | P7  | NA                             | NA          | NA               | NA          |
| 13210 |     | del. entire gene               | deletion    | del. entire gene | REP1 absent |
| 13216 |     | c.1414-1_1414delGAinsAT        | splice site | Exon 11          | p.?         |
| 13220 | P20 | NA                             | NA          | NA               | NA          |
| 13224 |     | c.757C>T                       | nonsense    | exon 6           | p.Arg253*   |
| 13226 |     | c.940-2A>T                     | splice site | Intron 7         | p.?         |
| CHM01 | P10 | c.799C>T                       | nonsense    | exon 6           | p.Arg.267*  |
| CHM02 | P18 | c.799C>T                       | nonsense    | exon 6           | p.Arg.267*  |
| CHM03 |     | del. entire gene <sup>††</sup> | deletion    | del. entire gene | REP1 absent |
| CHM04 |     | c.25_28del4ins11               | frameshift  | exon 1           | p.?         |
| CHM05 | P11 | NA                             | NA          | NA               | NA          |
| CHM06 | P12 | c.1138 C>T                     | nonsense    | Exon 9           | p.Gln380*   |
| CHM07 | P1  | c.799C>T                       | nonsense    | Exon 6           | p.Arg267*   |
| CHM08 |     | NA                             | NA          | NA               | NA          |
| CHM09 |     | c.799C>T                       | nonsense    | Exon 6           | p.Arg267*   |

NA: sample or screening result not available; C: confirmed mutation positive, resulting mutation not available;  
del=deletion; p.?: unknown protein effect.

\*\* Novel mutation; <sup>††</sup> Deletion of entire gene and neighboring POU3 gene.

Patients who are siblings or from same pedigree: 13034/13067; 13048/13050; 13057/13183; 13062/13063;  
13185/13186;13073/13074;13086/13087;13099/13100;13130/13131/13132;13203/13204/13205;13177/13208;  
CHM01/CHM02
