# Supplementary material
Source: PubMed Central journal article supplement (PMC5319901)
Supplement: NIHMS827289-supplement-3.pdf [file NIHMS827289-supplement-3.pdf]

**Supplementary Table 2:** Association between SD-OCT and NIR-REF parameters and visual acuity.

| OCT Parameter as predictors | Linear regression analysis                                                         |          | Mean VA by OCT parameter quartile |               |               |             | P-value* | R <sup>2</sup> |
|-----------------------------|------------------------------------------------------------------------------------|----------|-----------------------------------|---------------|---------------|-------------|----------|----------------|
|                             | Slope for visual acuity in LogMAR with per 100 unit increase in OCT parameter (SE) | P-value* | <Q1                               | >=Q1, <Median | >=Median, <Q3 | >=Q3        |          |                |
| ONL extent (μm)             | -0.012 (0.003)                                                                     | <0.001   | 0.81 (0.17)                       | 0.38 (0.05)   | 0.25 (0.08)   | 0.10 (0.02) | 0.0001   | 0.25           |
| EZ extent (μm)              | -0.013 (0.002)                                                                     | <0.001   | 0.91 (0.17)                       | 0.48 (0.09)   | 0.15 (0.03)   | 0.09 (0.02) | <.0001   | 0.21           |
| Foveal thickness (μm)       | -0.484 (0.092)                                                                     | <0.001   | 1.14 (0.20)                       | 0.30 (0.04)   | 0.11 (0.02)   | 0.11 (0.02) | <.0001   | 0.40           |
| Foveal ONL thickness (μm)   | -0.729 (0.134)                                                                     | <0.001   | 1.13 (0.19)                       | 0.30 (0.04)   | 0.09 (0.02)   | 0.13 (0.03) | <.0001   | 0.39           |
| RPE area (μm <sup>2</sup> ) | -1.186 (0.236)                                                                     | <0.001   | 0.99 (0.17)                       | 0.43 (0.09)   | 0.19 (0.05)   | 0.08 (0.02) | <.0001   | 0.11           |
| RPE extent (μm)             | -0.014 (0.003)                                                                     | <0.001   | 0.98 (0.18)                       | 0.44 (0.09)   | 0.15 (0.04)   | 0.10 (0.02) | 0.0001   | 0.22           |

\* Inter-eye correlation was accounted for using generalized estimating equations (GEE)
