# Supplementary material
Source: PubMed Central journal article supplement (PMC5319901)

Supplementary Figure 1

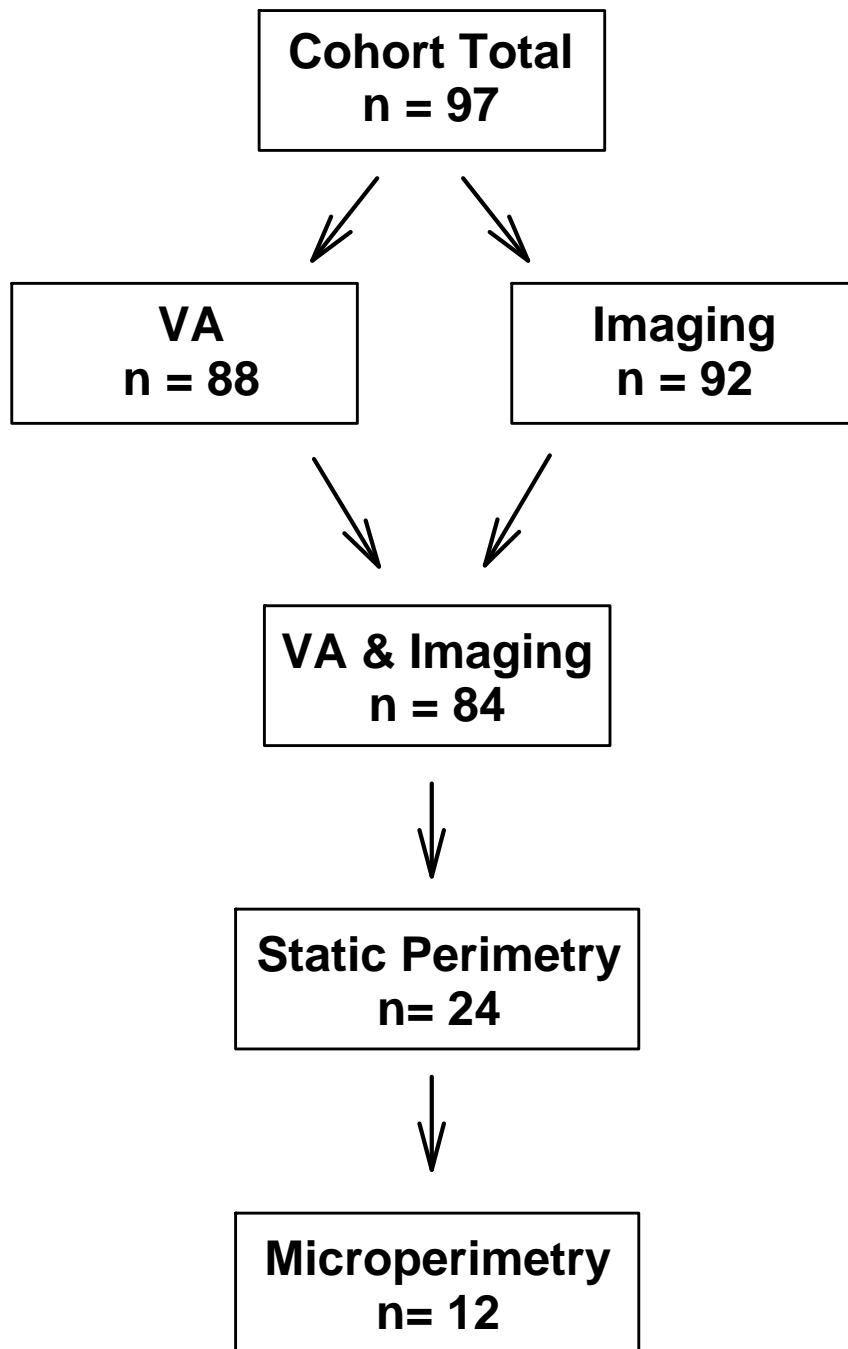

Supplement: NIHMS827289-supplement-1.pdf [file NIHMS827289-supplement-1.pdf]
